# Supplementary material
Source: Springer Nature journal article supplement (https://www.springermedizin.de/resource/supplementary/12875_2005_157_MOESM1_ESM.pdf/9436406)
Supplement: MOESM1 [file 9436406]

## **Vignette 2**

You have been feeling pretty well up to now.

But then you start to feel not quite right. You're not sure when it started, but you do remember that, about six weeks ago, you had a bout of diarrhoea for one day.

That particular bout settled and you think you think you got back to normal for about a week - although maybe you were actually a bit constipated over that time. After that week, you had another short bout of diarrhoea, just for a morning. It's been a bit like that since then. Sometimes you have diarrhoea – about three times in a day – and sometimes you go four or five days without anything.

You don't have any real pain, but you are beginning to notice some discomfort low down on your left side from time to time.

*What do you do?*

Over the next two or three weeks, you still have the diarrhoea. There are one or two mornings when you think you see some blood in it, but you're not very sure.

The discomfort you were feeling in your left side seems to get a bit more painful and starts to nag a bit. It feels a bit like you've hurt a muscle deep inside.

*What do you do?*
